# Supplementary material for: Electrocatalytic water oxidation of coral-like porous Zn-CoP nanohybrids synergistically inspired by photothermal and photoelectronic effects
Source: Royal Society of Chemistry journal article supplement (doi:10.1039/d3ta01890c), 2023-01-01
Supplement: d3ta01890c1.pdf [file d3ta01890c1.pdf]

## *Supplementary Information*

### **Photothermal and photoelectronic effects synergistically inspired electrocatalytic water oxidation of the coral-like porous Zn-CoP nano hybrids**

*Zhangyu Ma,<sup>†</sup> Shasha Wang,<sup>†</sup> Xuyun Lu, Yanan Chang, Jianchun Bao and Ying Liu\**

*Jiangsu Collaborative Innovation Center of Biomedical Functional Materials, School of Chemistry and Materials Science, Nanjing Normal University, Nanjing 210023, P. R. China*

*Email: [liuyingg@njnu.edu.cn](mailto:liuyingg@njnu.edu.cn)*

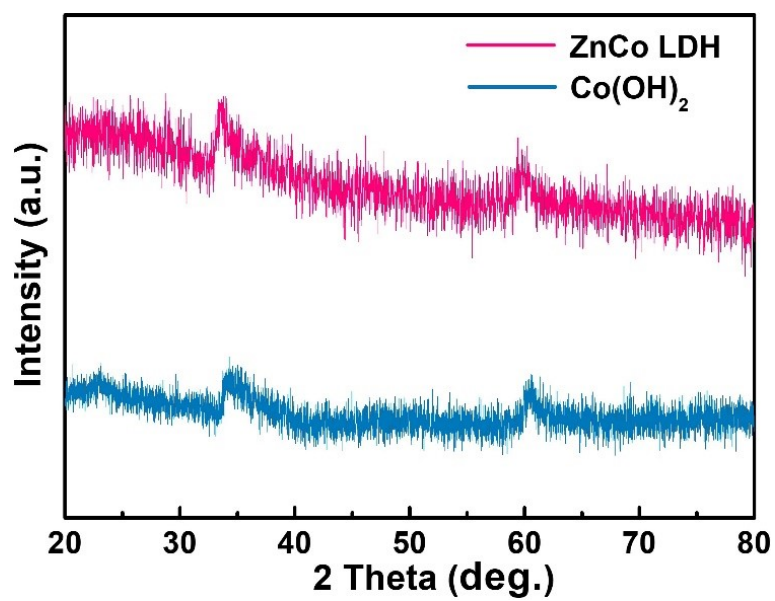

Fig. S1 XRD pattern for the ZnCo-LDH.

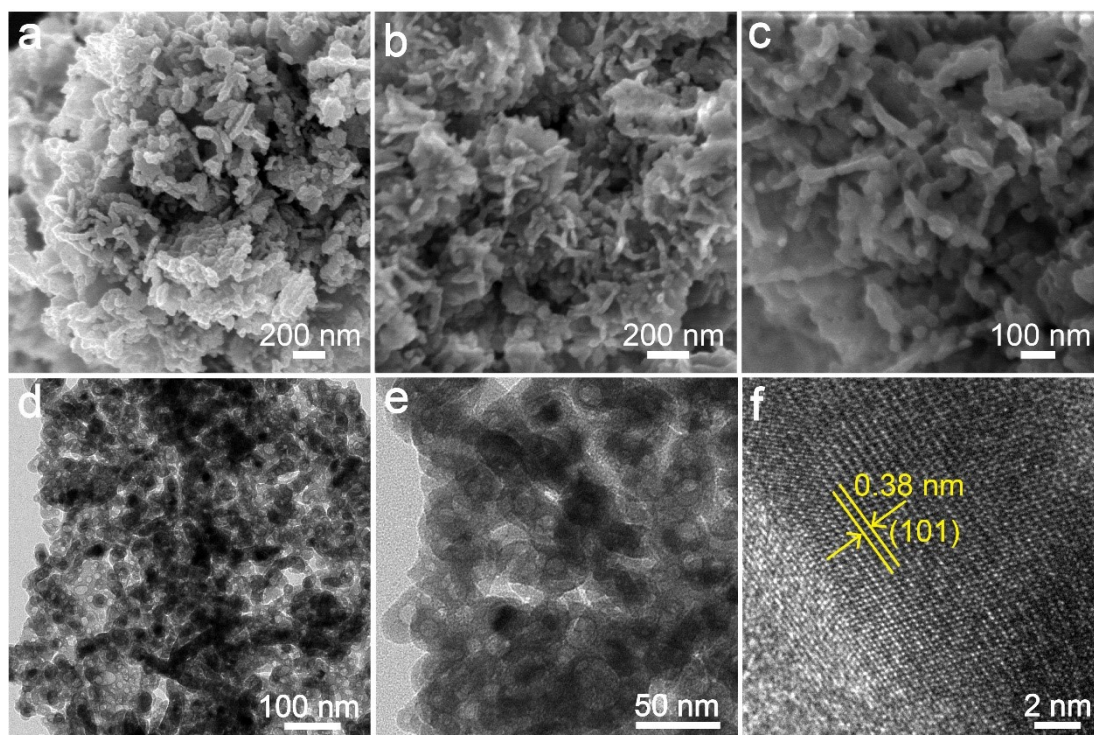

Fig. S2 (a-c) SEM, (d, e) TEM and (f) HRTEM images of the Zn-CoP NHs.

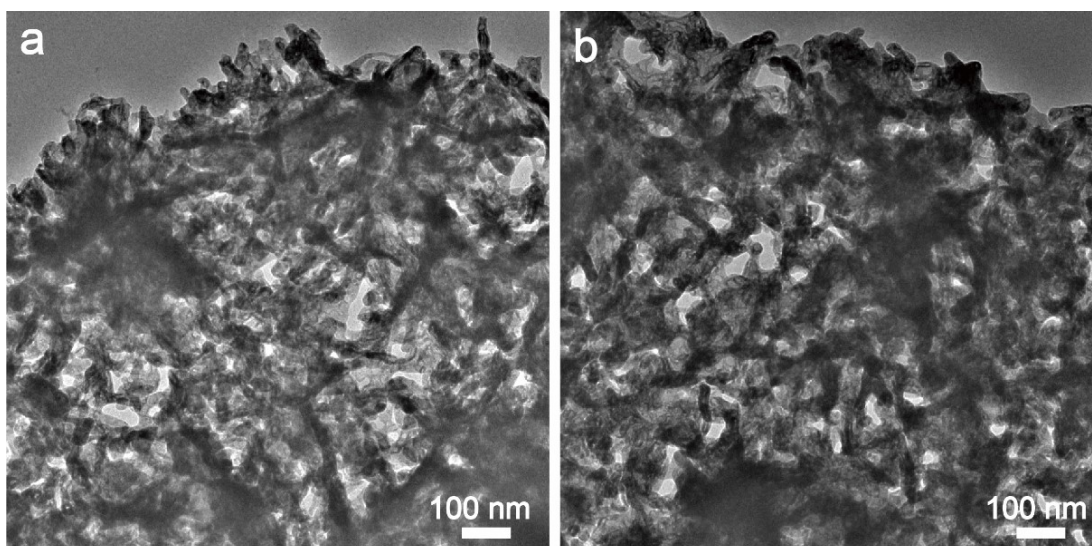

Fig. S3 TEM images for the pure CoP.

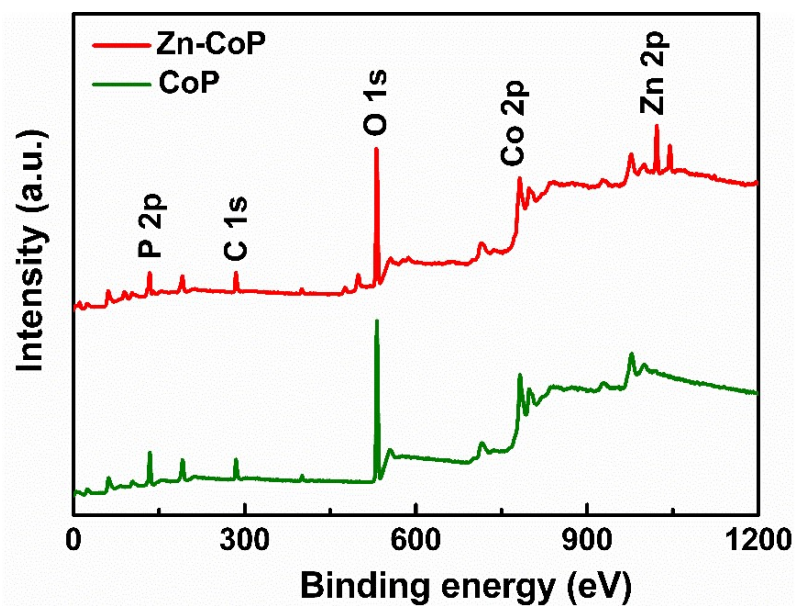

Fig. S4 Survey XPS spectra for the CoP and Zn-CoP NHs.

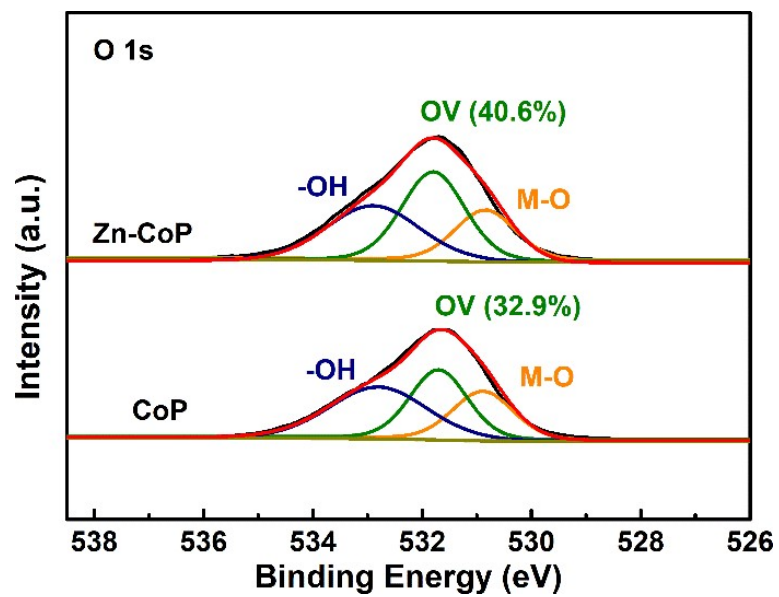

Fig. S5 O1s fine XPS spectra for the CoP and Zn-CoP NHs.

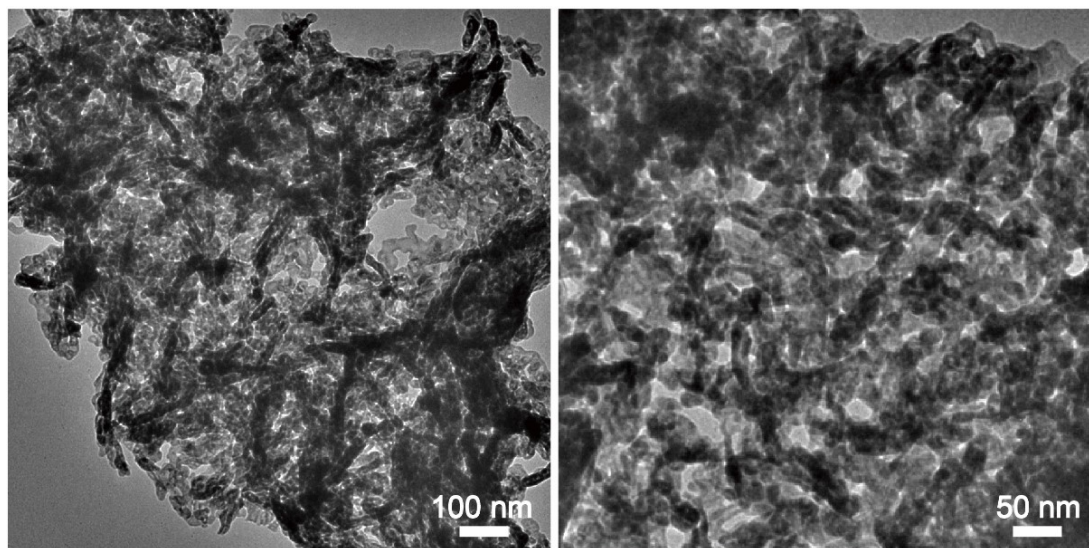

Fig. S6 TEM images for the Zn-CoP-1 catalyst.

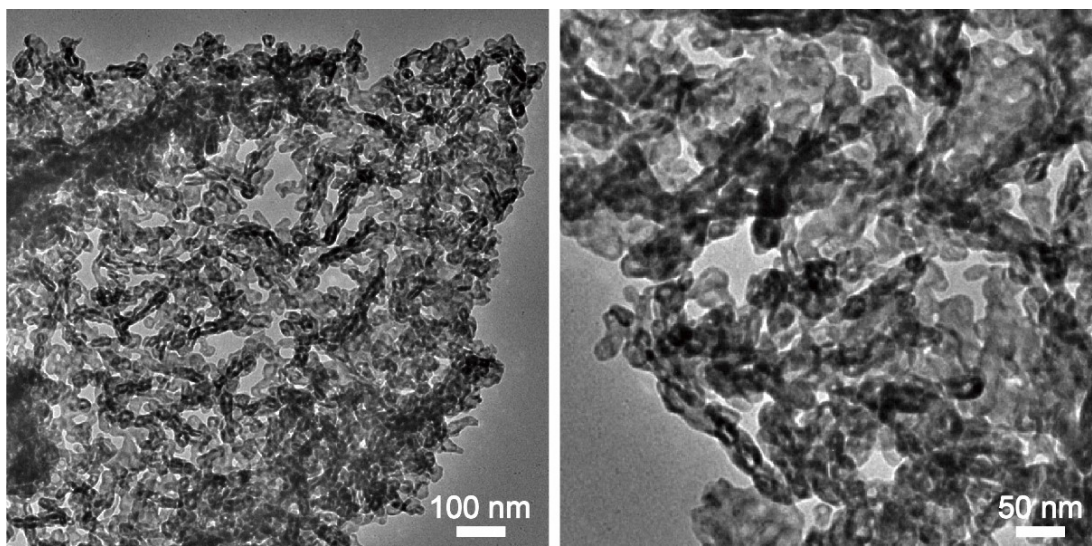

Fig. S7 TEM images for the Zn-CoP-6 catalyst.

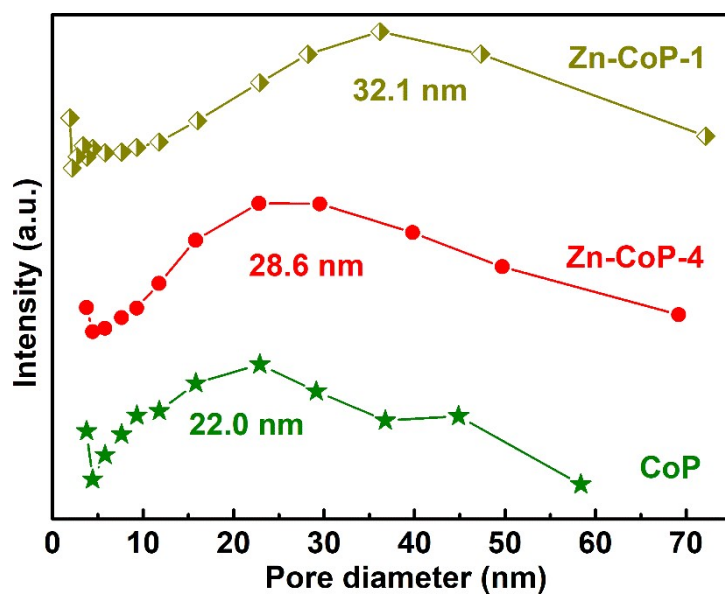

Fig. S8 BET pore-size distribution plots for the Zn-CoP-1, Zn-CoP-4 and CoP catalysts.

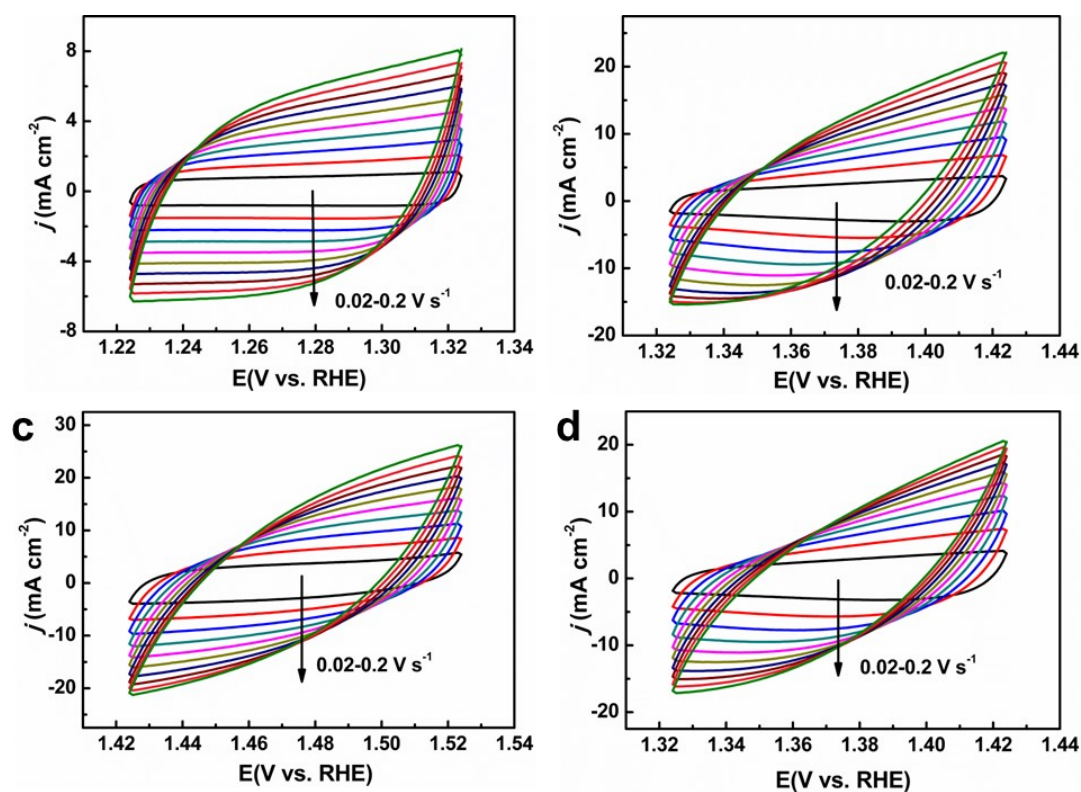

Fig. S9 Cyclic voltammetry curves for (a) CoP, (b) Zn-CoP-1, (c) Zn-CoP-4, and (d) Zn-CoP-6 catalysts that measured in 1.0 M KOH.

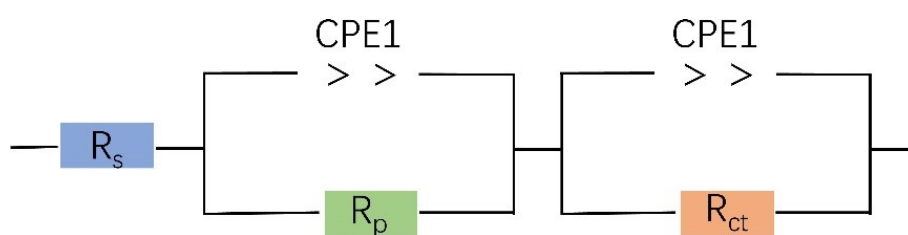

Fig. S10 Equivalent circuit diagram employed for fitting the Nyquist plots of the Zn-CoP NHs and other control catalysts. The  $R_s$  and  $R_p$  herein represent resistor, while  $R_{ct}$  stands for interface charge transfer resistance, and CPE1 and CPE2 on behalf of constant phase elements.

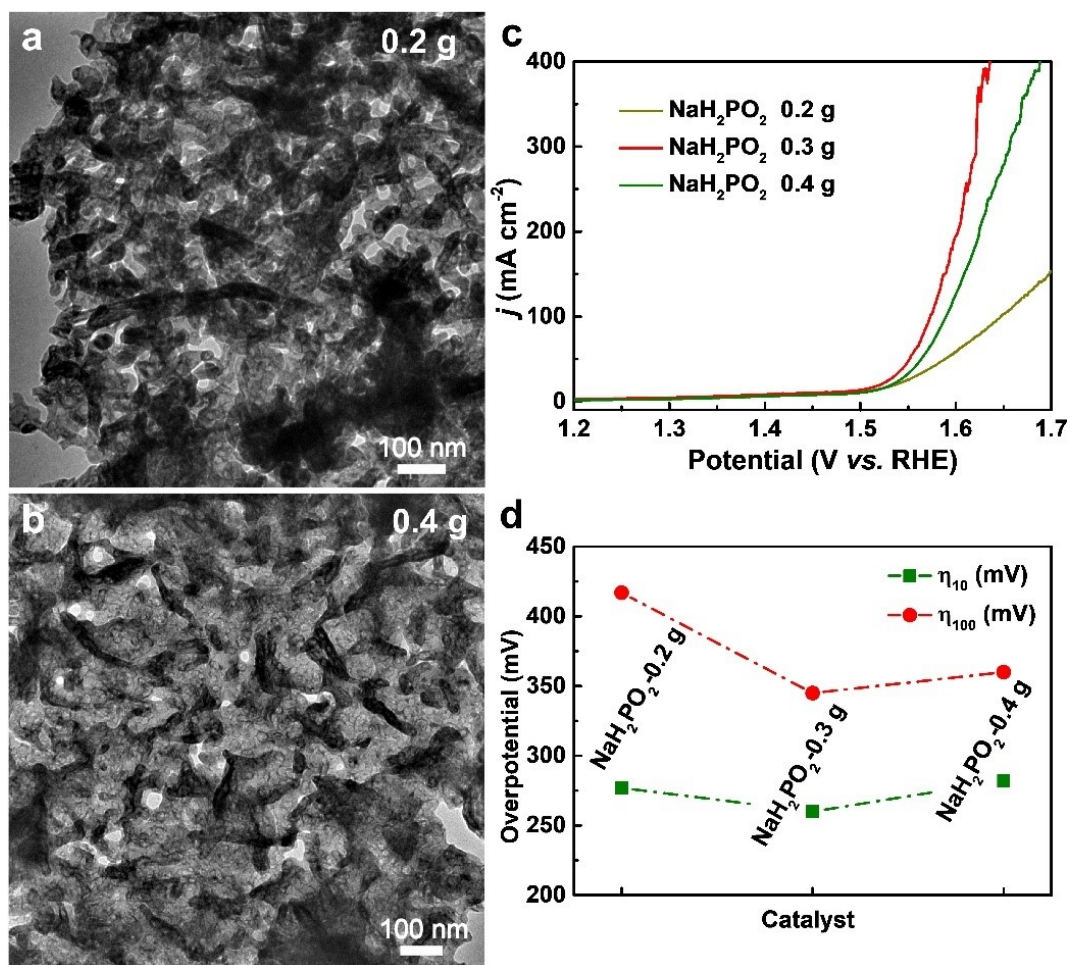

Fig. S11 TEM images of the Zn-CoP products with a  $\text{NaH}_2\text{PO}_2$  dosage of (a) 0.2 g, (b) 0.4 g. (c) OER LSV curves and (d) overpotentials of the Zn-CoP products with different  $\text{NaH}_2\text{PO}_2$  dosage.

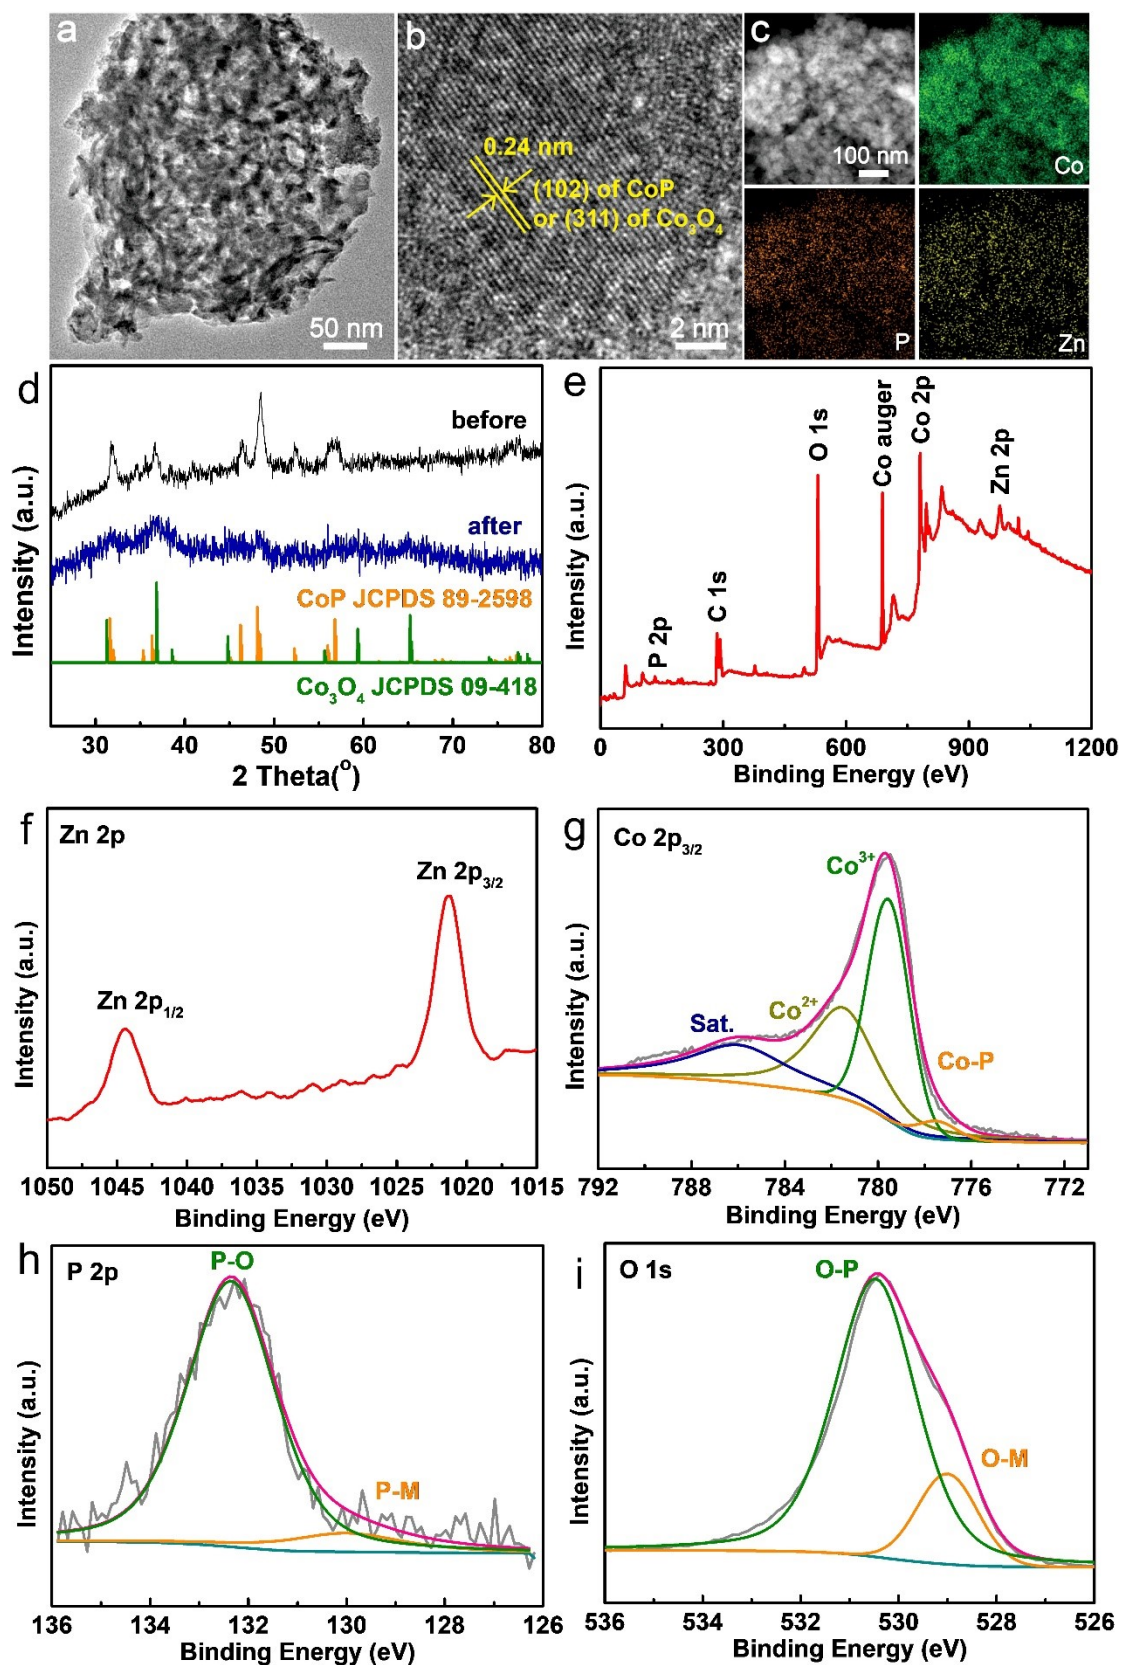

Fig. S12 (a) TEM, (b) HRTEM, (c) EDS mapping images of the Zn-CoP catalyst after stability test. (d) XRD pattern, (e) survey XPS spectrum, (f) Zn 2p, (g) Co 2p, (h) P 2p and (i) O 1s fine XPS spectra for the Zn-CoP catalyst after stability test.



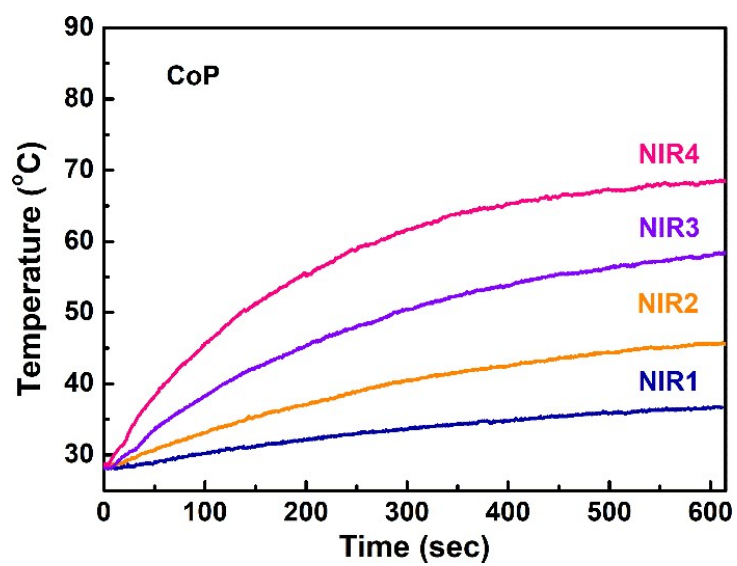

Fig. S13 Time-dependent temperature response curves for the CoP catalyst.

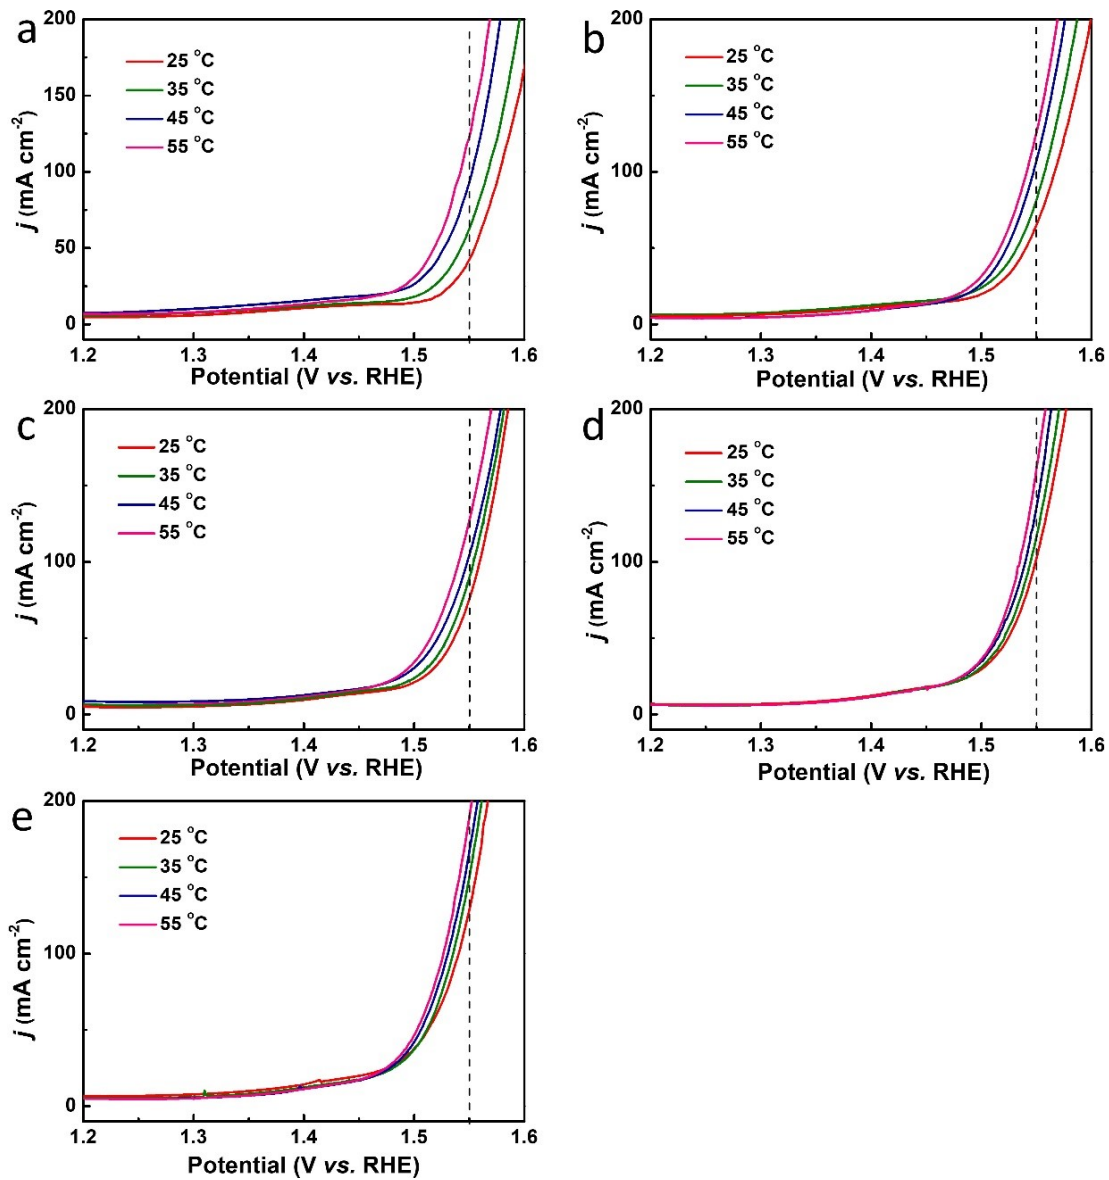

Fig. S14 LSV curves as a function of temperature for the Zn-CoP NHs (a) in the absence of NIR light irradiation, and those under the illumination of (b) NIR1, (c) NIR2, (d) NIR3 and (e) NIR4.

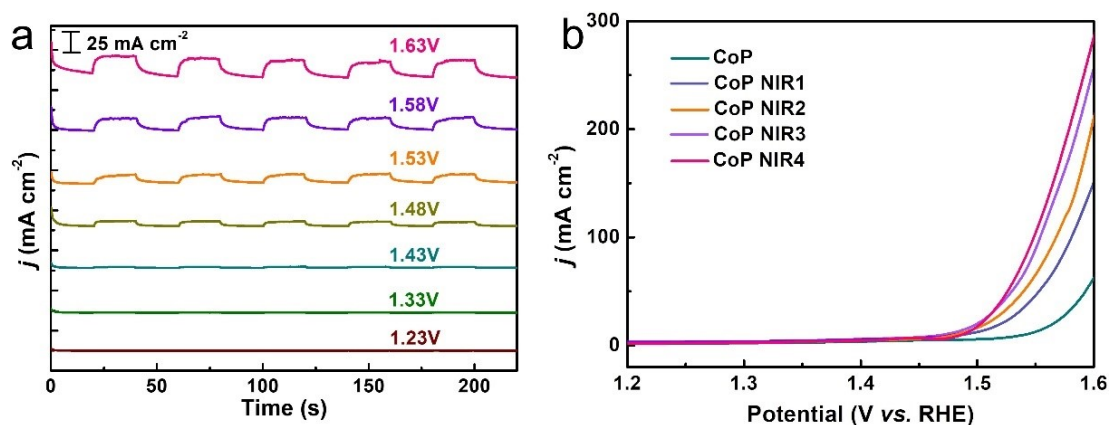

Fig. S15 (a) Photoelectronic response curves of the CoP catalyst at different applied potentials (vs. RHE). (b) OER LSV curves of the CoP catalyst under the illumination of NIR with different power intensities.

From Fig. 15, it was observed that the CoP catalyst also displays certain photoelectronic response and improved electrocatalytic OER performance, confirming the promotion effect of NIR irradiation on electrocatalytic performance. Nevertheless, the obtained photocurrent and improvement of electrocatalytic activity are smaller than those of the Zn-CoP NHs.

**Table S1** Various physical parameters extracted by fitting the Nyquist plots of CoP and Zn-CoP NHs with different Zn doping level (measured on GCE)

|          | $R_s(\Omega)$ | $R_1(\Omega)$ | $C_1(F)$             | $R_2(\Omega)$ | $C_2(F)$             |
|----------|---------------|---------------|----------------------|---------------|----------------------|
| Zn-CoP-4 | 3.6           | 22.2          | $3.5 \times 10^{-8}$ | 165.7         | $6.9 \times 10^{-3}$ |
| Zn-CoP-1 | 3.8           | 23.8          | $5.1 \times 10^{-8}$ | 213.8         | $5.5 \times 10^{-3}$ |
| Zn-CoP-6 | 3.7           | 23.9          | $4.5 \times 10^{-8}$ | 192.6         | $7.9 \times 10^{-3}$ |
| CoP      | 4.0           | 26.7          | $2.8 \times 10^{-8}$ | 254.3         | $5.9 \times 10^{-3}$ |

Table S2. Comparison of the electrocatalytic OER properties of some recently reported transition metal compounds in 1.0 M KOH

| Catalyst                                         | Overpotential ( $\eta_{10}$ , mV) | Overpotential at different current density (mV) | Tafel slope (mV dec <sup>-1</sup> ) | Ref.                                                     |
|--------------------------------------------------|-----------------------------------|-------------------------------------------------|-------------------------------------|----------------------------------------------------------|
| Zn-CoP                                           | 189                               | 297<br>@100 mA cm <sup>-2</sup>                 | 79                                  | This work                                                |
| Mo-NiS <sub>x</sub> @NiFe LDH/NF                 | 224                               | 271<br>@100 mA cm <sup>-2</sup>                 | 44.4<br>1                           | <i>J. Mater. Chem. A</i> 2022, 10, 18989-18999           |
| Ni <sub>3</sub> FeN-HC/NF                        | 219                               | /                                               | 63                                  | <i>J. Mater. Chem. A</i> 2022, 10, 7911-7919             |
| Co-Mo-P@NCNS-600                                 | 270                               | /                                               | 60.3                                | <i>J. Mater. Chem. A</i> 2021, 9, 1143-1149              |
| Ni <sub>2</sub> Fe <sub>1</sub> Sq-zbr-MOF       | 230                               | 260<br>@50 mA cm <sup>-2</sup>                  | 37.3                                | <i>Adv. Energy Mater.</i> 2023, 13, 2202964              |
| Co(OH) <sub>2</sub> /NiP <sub>x</sub>            | 236                               | 304<br>@100 mA cm <sup>-2</sup>                 | 52                                  | <i>Adv. Funct. Mater.</i> 2022, 32, 2206407              |
| Co/N-C-800                                       | 274                               | /                                               | 43.6                                | <i>ACS Appl. Mater. Interfaces</i> 2022, 14, 8549-8556   |
| Fe-Co <sub>2</sub> P@Fe-N-C                      | 300                               | /                                               | 79                                  | <i>Small</i> 2021, 17, 2101856                           |
| D-CoNiO <sub>x</sub> -P-NFs                      | 246                               | 370<br>@292 mA cm <sup>-2</sup>                 | 60.5                                | <i>Energy Environ. Sci.</i> 2020, 13, 5097-5103          |
| CeO <sub>2</sub> -NiCoP <sub>x</sub> /NCF        | 260                               | 455<br>@500 mA cm <sup>-2</sup>                 | 72                                  | <i>Appl. Catal. B Environ.</i> 2022, 316, 121678         |
| CMFNZO                                           | 295                               | /                                               | 53.7                                | <i>J. Mater. Chem. A</i> 2022, 10, 17633-17641           |
| a-NiCo/NC                                        | 252                               | /                                               | 49                                  | <i>Angew. Chem. Int. Ed.</i> 2022, e202207537            |
| CoZn MOF/CC                                      | 287                               | /                                               | 76.3                                | <i>Small</i> 2021, 17, 2105150                           |
| Co <sub>3</sub> O <sub>4</sub> /CeO <sub>2</sub> | 270                               | 370<br>@88.5 mA cm <sup>-2</sup>                | 60                                  | <i>Adv. Mater.</i> 2019, 31, 1900062                     |
| NiMoNS                                           | 260                               | /                                               | 54.7                                | <i>ACS Appl. Mater. Interfaces</i> 2021, 13, 26064-26073 |

|                                                                  |     |                                 |      |                                                                 |
|------------------------------------------------------------------|-----|---------------------------------|------|-----------------------------------------------------------------|
| <b>Co<sub>3</sub>O<sub>4</sub>/CoMoO<sub>4</sub>-<br/>0.1-FO</b> | 217 | 342<br>@100 mA cm <sup>-2</sup> | 72   | <i>Chem. Eng. J.</i> 2023,<br>452, 139250                       |
| <b>CoZnRuO<sub>x</sub></b>                                       | 244 | /                               | 81.6 | <i>ACS Appl. Mater.<br/>Interfaces</i> 2022, 14,<br>38669-38676 |
| <b>CFS-0.08</b>                                                  | 268 | /                               | 63.9 | <i>Chem. Eng. J.</i> 2022,<br>431, 133980                       |
| <b>NiSe<sub>2</sub>/FeSe<sub>2</sub></b>                         | 256 | 50<br>@290 mA cm <sup>-2</sup>  | 50   | <i>Appl. Catal. B<br/>Environ.</i> 2021, 299,<br>120638         |
| <b>Co<sub>9</sub>S<sub>8</sub>@NiFe<br/>LDH</b>                  | 220 | /                               | 52   | <i>J. Mater. Chem. A</i><br>2021, 9, 12244-<br>12254            |

Table S3 Various physical parameters extracted by fitting the Nyquist plots of Zn-CoP NHs under the illumination of 808 nm light with different power density (measured on carbon cloth)

|        | <b>R<sub>s</sub>(Ω)</b> | <b>R<sub>1</sub>(Ω)</b> | <b>C<sub>1</sub>(F)</b> | <b>R<sub>2</sub>(Ω)</b> | <b>C<sub>2</sub>(F)</b> |
|--------|-------------------------|-------------------------|-------------------------|-------------------------|-------------------------|
| Zn-CoP | 2.9                     | 0.80                    | 6.4*10 <sup>-2</sup>    | 45.2                    | 0.35                    |
| NIR1   | 2.8                     | 0.63                    | 4.4*10 <sup>-2</sup>    | 13.2                    | 0.33                    |
| NIR2   | 2.5                     | 0.54                    | 1.4*10 <sup>-2</sup>    | 6.6                     | 0.28                    |
| NIR3   | 2.2                     | 0.47                    | 5.6*10 <sup>-3</sup>    | 4.0                     | 0.26                    |
| NIR4   | 2.1                     | 0.40                    | 3.5*10 <sup>-3</sup>    | 3.4                     | 0.23                    |
